# Supplementary material for: Impact of aging on food consumption in rural China: Implications for dietary upgrading and health improvement
Source: Frontiers journal article supplement (doi:10.3389/fnut.2022.933343), 2022-11-24
Supplement: Table_1.pdf [file Table_1.pdf]

**Table S1.** Food classification

| Food groups                     | Food items                                                                                                                                                                                |
|---------------------------------|-------------------------------------------------------------------------------------------------------------------------------------------------------------------------------------------|
| Grains                          | Wheat, wheat flour, dry noodles, wet noodles, bread, buns, instant noodles, rice, corn, corn flour, millet and other cereals, sweet potatoes, potatoes, soybeans and other beans, tofu    |
| Edible oil and fats             | Vegetable oil, animal oil                                                                                                                                                                 |
| Vegetables and edible mushrooms | Fresh vegetables, leaf stems, fruit vegetables and other fresh vegetables, dried vegetables, dried bamboo shoots, other dried vegetables, seaweed, nori, dried mushrooms, fresh mushrooms |
| Meat and meat products          | Pork, beef, and mutton                                                                                                                                                                    |
| Poultry                         | Chicken, duck, and geese                                                                                                                                                                  |
| Aquatic products                | Fresh fish (shrimp and crab), fresh shellfish, dried fish, and dried shellfish                                                                                                            |
| Eggs                            | Egg, duck egg, and goose egg                                                                                                                                                              |
| Milk and dairy products         | Fresh milk, milk powder, yogurt, and cheese                                                                                                                                               |
| Melons and fruits               | Fresh fruit and nuts                                                                                                                                                                      |
| Sugar                           | Sugar                                                                                                                                                                                     |
